# Supplementary material for: Motion of dust particles in dry snow under temperature gradient metamorphism
Source: Copernicus journal article supplement (doi:10.5194/tc-13-2345-2019), 2019-09-06
Supplement: Supplementary file [file tc-13-2345-2019-supplement-title-page.pdf › tc-13-2345-2019-supplement-title-page.pdf]

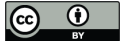

*Supplement of*

## **Motion of dust particles in dry snow under temperature gradient metamorphism**

**Pascal Hagenmuller et al.**

*Correspondence to:* Pascal Hagenmuller ([pascal.hagenmuller@meteo.fr](mailto:pascal.hagenmuller@meteo.fr))

- [tc-13-2345-2019-supplement-title-page.pdf](#)
- [S1.mp4](#)
- [S2.mp4](#)

The copyright of individual parts of the supplement might differ from the CC BY 4.0 License.
